# Supplementary material for: Survey of green building water systems reveals elevated water age and water quality concerns
Source: Royal Society of Chemistry journal article supplement (doi:10.1039/c5ew00221d), 2015-11-05
Supplement: c5ew00221d1.pdf [file c5ew00221d1.pdf]

**Table S1. Calculation of percentage of water used for maintenance relative to total annual water demand**

|                                            |                 |                                                               |
|--------------------------------------------|-----------------|---------------------------------------------------------------|
| Total Volume of Water Used for Maintenance | 3000 gallons/yr | (using 1500 gallons to prime system 2X/yr after disinfection) |
| Total Volume of Water Used by Consumers    | 5200 gallons/yr | (Calculation based on reported use)                           |
|                                            | 7950 gallons/yr | (Calculation based on estimated use)                          |
| <b>Percent Used for Maintenance</b>        | <b>58%</b>      | <b>(Reported Use)</b>                                         |
|                                            | <b>38%</b>      | <b>(Estimated Use)</b>                                        |

***Notes about Calculation based on reported use:***

- 1. Facility reports to have 10 full time employees, that each use 520 gallons/year*
- 2. 10 employees \* 520 gallons/yr-employee = 5200 gallons/yr*

***Notes about Calculation based on estimated use:***

- 1. Inquiry revealed that upwards of 20 additional people are on-site during the summer months, to conduct research*
- 2. Each full-time employee was assumed to use the 520 gallons/year, so again 5200 gallons.*
- 3. To estimate the use due to the extra people on-site, the 520 gallons/employee-year was divided into gallons/work day (520 gallons/employee-year / 50 work weeks/year / 5 work days/week = 2.08 gallons/employee/day.*
- 4. For the additional 20 people during the summer months, 2.08 gallons/employee-work day was used to estimate additional use (2.08 gallons/employee-work day \* 20 additional employees \* 66 work days = 2750 gallons/summer)*
- 5. Total use = 2750 + 5200 = 7950*

**Table S.2 Evidence of mild nitrification at the LEED healthcare suite**

| Parameter                               | Influent | Exam<br>Rm1 -<br>Stagnant | Exam<br>Rm1 -<br>Flushed | Exam<br>Rm2 -<br>Stagnant | Exam<br>Rm2 -<br>Flushed | Exam<br>Rm3 -<br>Stagnant | Exam<br>Rm3 -<br>Flushed | Exam<br>Rm4 -<br>Stagnant | Exam<br>Rm4 -<br>Flushed |
|-----------------------------------------|----------|---------------------------|--------------------------|---------------------------|--------------------------|---------------------------|--------------------------|---------------------------|--------------------------|
| pH                                      | 7.1      | 6.8                       | 7.0                      | 6.5                       | 6.6                      | 6.5                       | 6.7                      | 6.5                       | 6.7                      |
| Temp. (°C)                              | 18       | 22                        | 24                       | 23                        | 24                       | 23                        | 22                       | 24                        | 24                       |
| Total Chlorine (ppm Cl <sub>2</sub> )   | 1.2      | 0.04                      | 0.08                     | 0.01                      | 0.19                     | 0.02                      | 0.22                     | 0.01                      | 0.15                     |
| NH <sub>3</sub> (ppm as N)              | 0.36     | 0.1                       | 0.35                     | 0.34                      | 0.37                     | 0.26                      | 0.38                     | 0.2                       | 0.39                     |
| NO <sub>2</sub> <sup>-</sup> (ppm as N) | 0.009    | 0.002                     | 0.008                    | 0.015                     | 0.006                    | 0.025                     | 0.005                    | 0.024                     | 0.009                    |
| NO <sub>3</sub> <sup>-</sup> (ppm as N) | 1.21     | 1.47                      | 1.35                     | 1.21                      | 0.97                     | 1.40                      | 1.06                     | 1.67                      | 1.03                     |
| Alkalinity (ppm as CaCO <sub>3</sub> )  | 50       | 56                        | 49                       | 57                        | 49                       | 59                        | 48                       | 57                        | 48                       |

*Notes:*

1. *Slight drop in pH in stagnant vs flushed samples*
2. *Change in nitrogen speciation; decrease in NH<sub>3</sub> in stagnant vs flushed samples*
3. *Increase in alkalinity of 6-9 mg/L as CaCO<sub>3</sub>*
4. *Biological Activity Reaction Tests (BARTs) positive for nitrifying bacteria*
5. *Absence of chlorine and elevated temperatures give the opportunity for growth*

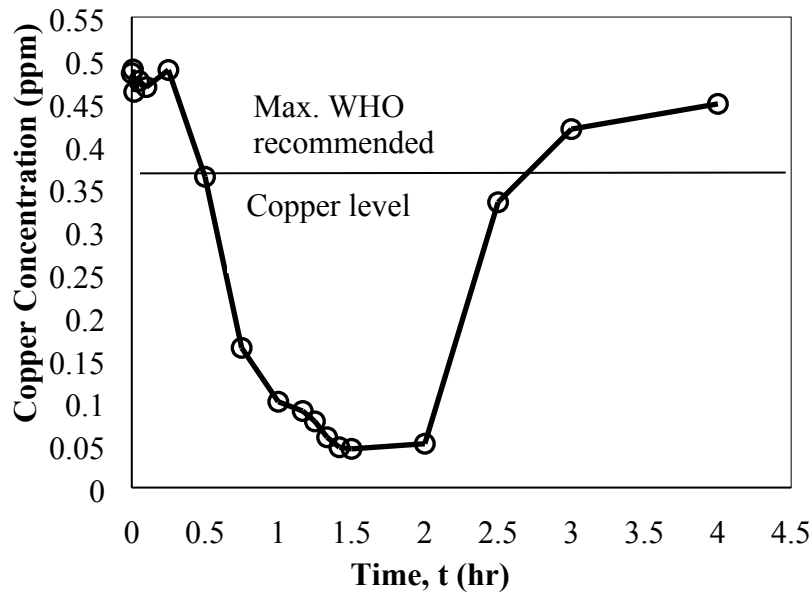

**Figure S.1: Copper concentration at a tap as a function of flushing ( $0 < t < 2$  hours), followed by stagnation ( $t > 2$  hours)**

*Notes: Further evidence of nitrification at the tap as opposed to in well-flushed distribution system water.*

The data that follows is water quality data from the remainder of the field sites.

**Net-Zero House Water Use and Quality Data:**

1. Details of total water use during water draws in simulated net-zero energy building

| Day of Week | Total Use (gal) |
|-------------|-----------------|
| Monday      | 65.21           |
| Tuesday     | 65.21           |
| Wednesday   | 86.94           |
| Thursday    | 65.21           |
| Friday      | 65.21           |
| Saturday    | 86.64           |
| Sunday      | 65.21           |
| TOTAL       | 499.63          |

*Note: the only cold water used was temper the hot water to the desired temperature during simulated use. Typical household use in the U.S. is about 300 gallons/day*

2. Water quality data as a function of hot water flushing during the first site visit

| Hot Flushing Time (min) | Solar Water Heater Temperature (° C) | Electric Water Heater Temp (° C) | Chlorine (ppm Cl <sub>2</sub> ) | pH  | TOC (ppm) |
|-------------------------|--------------------------------------|----------------------------------|---------------------------------|-----|-----------|
| 0                       | 59.4                                 | 50.6                             | 0.02                            | 8.9 | 1.26      |
| 5                       | 54.4                                 | 36.7                             | 0.33                            | 8.3 | 1.81      |
| 10                      | 43.9                                 | 37.8                             | 0.36                            | 8.3 | 1.56      |
| 15                      | 37.8                                 | 37.8                             | 0.36                            | 8.1 | 1.69      |
| 20                      | 31.1                                 | 33.3                             | 0.37                            | 8.0 | 1.55      |
| 25                      | 24.4                                 | 28.9                             | 0.48                            | 7.9 | 1.50      |
| 30                      | 21.1                                 | 26.7                             | 0.63                            | 7.9 | 1.51      |
| 35                      | 20.0                                 | 22.2                             | 0.76                            | 7.9 | 1.42      |
| 40                      | 15.6                                 | 20.6                             | 0.83                            | 7.9 | 1.36      |
| 50                      | 15.6                                 | 17.8                             | 0.96                            | 7.9 | 1.43      |

\*TOC=Total Organic Carbon

3. Water quality data as a function of cold water flushing during the first site visit

| Cold Flushing Time (min) | Cold Water Temperature (° C) | Chlorine (ppm Cl <sub>2</sub> ) | pH  | TOC (ppm) |
|--------------------------|------------------------------|---------------------------------|-----|-----------|
| 0                        | 21.2                         | 0.04                            | 8.4 | 1.44      |
| 2                        | 10.9                         | 0.16                            | 8.8 | 1.44      |
| 4                        | 11.3                         | 0.18                            | 8.9 | 1.41      |
| 6                        | 10.8                         | 0.35                            | 8.9 | 1.42      |
| 8                        | 9.8                          | 0.40                            | 8.7 | 1.30      |
| 10                       | 9.5                          | 0.34                            | 8.7 | 1.34      |
| 15                       | 9.6                          | 0.65                            | 8.5 | 1.38      |
| 20                       | 9.8                          | 1.09                            | 8.0 | 1.29      |
| 25                       | 9.9                          | 1.15                            | 7.4 | 1.79      |
| 30                       | 9.9                          | 1.15                            | 7.5 | 1.35      |

4. Water heater temperature recovery in the solar water heater and electric water heater as a function of stagnation time after both tanks had been thoroughly flushed during the first site visit

| Recovery Time (min) | Solar Water Heater Temperature (° C) | Electric Water Heater Temp (° C) |
|---------------------|--------------------------------------|----------------------------------|
| 0                   | 15.6                                 | 17.8                             |
| 13                  | 16.7                                 | 25.6                             |
| 36                  | 17.8                                 | 37.8                             |
| 60                  | 17.8                                 | 48.8                             |

5. Water quality of the showering water as a function of flushing during the second site visit; All water was collected from three consecutive simulating showing events from the same showerhead.

| Shower Number | Approximate Volume Flushed (gallons) | Temperature (° C) | pH  | Total Chlorine (ppm Cl <sub>2</sub> ) |
|---------------|--------------------------------------|-------------------|-----|---------------------------------------|
| 1             | 0                                    | 27.6              | 7.5 | 0.03                                  |
|               | 4                                    | 42.6              | 7.6 | 0.06                                  |
|               | 8                                    | 43.5              | 7.6 | 0.06                                  |
| 2             | 8.5                                  | 38.3              | 7.7 | 0.08                                  |
|               | 12.5                                 | 42.3              | 7.7 | 0.08                                  |
|               | 16.5                                 | 41.8              | 7.7 | 0.1                                   |
| 3             | 17                                   | 37.8              | 7.5 | 0.09                                  |
|               | 21                                   | 39.1              | 8.0 | 0.09                                  |
|               | 25                                   | 42.8              | 7.6 | 0.09                                  |

6. Water quality from the hot and cold tap manifold and water heaters during the second site visit

| Sample                         | Temperature (° C) | pH   | Total Chlorine (ppm Cl <sub>2</sub> ) |
|--------------------------------|-------------------|------|---------------------------------------|
| Solar Water Heater             | 26.1              | 7.33 | 0.11                                  |
| Electric Water Heater          | 26.2              | 7.25 | 0.02                                  |
| Hot water manifold (stagnant)  | 30.1              | 7.44 | 0.05                                  |
| Hot water manifold (flushed)   | 48.1              | 7.35 | 0.08                                  |
| Cold water manifold (stagnant) | 23.2              | 7.39 | 0.33                                  |
| Cold water manifold (flushed)  | 22.2              | 7.62 | 0.95                                  |

### Conventional House Water Quality Data:

1. Water quality data as a function of cold tap flushing

| COLD TAP flushing time (min) | Temperature (° C) | pH   | Total Chlorine (ppm Cl <sub>2</sub> ) |
|------------------------------|-------------------|------|---------------------------------------|
| 0                            | 23.6              | 6.85 | 0.71                                  |
| 3                            | 9.9               | 6.8  | 1.04                                  |
| 5                            | 10.1              | 6.9  | 1.01                                  |
| 10                           | 10.5              | 7.02 | 1.01                                  |
| 15                           | 11.7              | 6.95 | 1.01                                  |
| After 15 minutes stagnation  | 15.6              | 6.79 | 0.99                                  |

Notes: chlorine concentration was stable after overnight stagnation

2. Water quality data as a function of hot tap flushing

| HOT TAP flushing time (min) | Temperature (° C) | pH   | Total Chlorine (ppm Cl <sub>2</sub> ) |
|-----------------------------|-------------------|------|---------------------------------------|
| 0                           | 42.4              | 6.92 | 0.06                                  |
| 3                           | 44.4              | 7.12 | 0.06                                  |
| 5                           | 44.9              | 7.17 | 0.08                                  |
| 10                          | 45.9              | 7.2  | 0.11                                  |
| 20                          | 42.6              | 7.19 | 0.16                                  |
| 30                          | 33                | 7.05 | 0.68                                  |
| 40                          | 29.4              | 7.03 | 0.89                                  |
| 50                          | 28.1              | 6.96 | 0.92                                  |
| 60                          | 27.5              | 7.13 | 0.96                                  |
| 70                          | 27.2              | 7.11 | 0.98                                  |
| 80                          | 27.1              | 7.08 | 0.99                                  |
| 90                          | 26.7              | 7.07 | 1.01                                  |
| After 15 minutes stagnation | 28.4              | 7.1  | 0.95                                  |

Notes: Chlorine residual was stable in hot tap during short-term stagnation, but did decay after overnight stagnation

## Net-zero Rainwater Office Water Quality Data:

### 1. Temperature and pH by sampling location

| Sample                   | Temperature<br>(° C) | pH  |
|--------------------------|----------------------|-----|
| Cistern                  | 25                   | 7.6 |
| Post-Treatment           | 28                   | 7.7 |
| Men's Cold Stagnant      | 29                   | 7.2 |
| Men's Cold Flushed       | 26                   | 7.6 |
| Kitchen Cold<br>Stagnant | 26                   | 7.3 |
| Kitchen Cold Flushed     | 26                   | 7.6 |
| Janitor Cold Stagnant    | 26                   | 7.6 |
| Janitor Cold Flushed     | 26                   | 7.6 |
| Kitchen Hot Stagnant     | 45                   | 7.3 |
| Kitchen Hot Flushed      | 47                   | 7.6 |
| Men's Hot Flushed        | 49                   |     |

### 2. Alkalinity by sampling location

| Sample Name            | Alkalinity<br>(mg/L as<br>CaCO <sub>3</sub> ) |
|------------------------|-----------------------------------------------|
| Cistern                | 104                                           |
| Post Treatment         | 112                                           |
| Men's Cold<br>Stagnant | 113                                           |
| Men's Cold Flushed     | 113                                           |
| Well Water             | 303                                           |



**Additional information on qPCR assays used:**

The supplementary information from Wang et al., 2012 has all relevant assay information. Please see:

<http://aem.asm.org/content/suppl/2012/08/08/AEM.01492-12.DCSupplemental/zam999103617so1.pdf>

qPCR assay information:

| Targeted Organisms | Targeted Genes | Sequences (5'-3')                                                                                              | Program                               |                                                 | Amplicon (bp) | Refs |
|--------------------|----------------|----------------------------------------------------------------------------------------------------------------|---------------------------------------|-------------------------------------------------|---------------|------|
|                    |                |                                                                                                                | Denaturation/<br>Enzyme<br>Activation | Denaturing/<br>Annealing/<br>Extension          |               |      |
| Legionella spp.    | 23S rRNA       | Leg23SF: CCCATGAAGCCCGTTGAA<br>Leg23SR: ACAATCAGCCAATTAGTACGAGTTAGC<br>Probe: HEX-TCCACACCTCGCCTATCAACGTCGTAGT | 95 °C for 2 min                       | 40 cycles of 95 °C for 5 s and 58.5 °C for 10 s | 92            | 1    |
| M. avium           | 16S rRNA       | MycavF: AGAGTTTGATCCTGGCTCAG<br>MycavR: ACCAGAAGACATGCGTCTTG                                                   | 98 °C for 2 min                       | 40 cycles of 98 °C for 5 s and 68 °C for 18 s   | 180           | 2    |
| V. vermiformis     | 18S rRNA       | Vv1227F: TTACGAGGTCAGGACTGT<br>Vv1728R: GACCATCCGGAGTTCTCG                                                     | 98 °C for 2 min                       | 40 cycles of 98 °C for 5 s and 72 °C for 18 s   | 502           | 3    |
| Total Bacteria     | 16S rRNA       | BACT1369F: CGGTGAATACGTTTCYCGG<br>PROK: GGWTACCTTGTTACGACTT                                                    | 98 °C for 2 min                       | 40 cycles of 98 °C for 5 s and 55 °C for 5 s    | 124           | 4    |
